# Supplementary material
Source: publisher figshare collection journal article supplement (https://acs.figshare.com/ndownloader/files/5106103)
Supplement: Supplementary file 1 [file 5106103]

 
data_phenol_34 
 
_audit_creation_method            SHELXL-97 
_chemical_name_systematic 
; 
 ? 
; 
_chemical_name_common             ? 
_chemical_melting_point           ? 
_chemical_formula_moiety          ? 
_chemical_formula_sum 
 'C34.50 H42 N2 O8.50' 
_chemical_formula_weight          620.70 
 
loop_ 
 _atom_type_symbol 
 _atom_type_description 
 _atom_type_scat_dispersion_real 
 _atom_type_scat_dispersion_imag 
 _atom_type_scat_source 
 'C'  'C'   0.0033   0.0016 
 'International Tables Vol C Tables 4.2.6.8 and 6.1.1.4' 
 'H'  'H'   0.0000   0.0000 
 'International Tables Vol C Tables 4.2.6.8 and 6.1.1.4' 
 'N'  'N'   0.0061   0.0033 
 'International Tables Vol C Tables 4.2.6.8 and 6.1.1.4' 
 'O'  'O'   0.0106   0.0060 
 'International Tables Vol C Tables 4.2.6.8 and 6.1.1.4' 
 
_symmetry_cell_setting            Triclinic 
_symmetry_space_group_name_H-M    P-1
 
loop_ 
 _symmetry_equiv_pos_as_xyz 
 'x, y, z' 
 '-x, -y, -z' 
 
_cell_length_a                    9.0359(4) 
_cell_length_b                    12.6771(6) 
_cell_length_c                    14.4654(7) 
_cell_angle_alpha                 87.720(2) 
_cell_angle_beta                  78.039(2) 
_cell_angle_gamma                 79.337(2) 
_cell_volume                      1593.03(13) 
_cell_formula_units_Z             2 
_cell_measurement_temperature     153(2) 
_cell_measurement_reflns_used     ? 
_cell_measurement_theta_min       ? 
_cell_measurement_theta_max       ? 
 
_exptl_crystal_description        needles 
_exptl_crystal_colour             colorless
_exptl_crystal_size_max           0.50 
_exptl_crystal_size_mid           0.06 
_exptl_crystal_size_min           0.05 
_exptl_crystal_density_meas       ? 
_exptl_crystal_density_diffrn     1.294 
_exptl_crystal_density_method     'not measured' 
_exptl_crystal_F_000              662 
_exptl_absorpt_coefficient_mu     0.093 
_exptl_absorpt_correction_type    none 
_exptl_absorpt_correction_T_min   ? 
_exptl_absorpt_correction_T_max   ?
_exptl_absorpt_process_details    ? 
 
_exptl_special_details 
; 
 ? 
; 
 
_diffrn_ambient_temperature       153(2) 
_diffrn_radiation_wavelength      0.71073 
_diffrn_radiation_type            MoK\a 
_diffrn_radiation_source          'fine-focus sealed tube' 
_diffrn_radiation_monochromator   graphite 
_diffrn_measurement_device_type   'Nonius Kappa CCD' 
_diffrn_measurement_method        \w-scans
_diffrn_detector_area_resol_mean  ? 
_diffrn_standards_number          ? 
_diffrn_standards_interval_count  ? 
_diffrn_standards_interval_time   ? 
_diffrn_standards_decay_%         ? 
_diffrn_reflns_number             9982 
_diffrn_reflns_av_R_equivalents   0.0950 
_diffrn_reflns_av_sigmaI/netI     0.3839 
_diffrn_reflns_limit_h_min        -11 
_diffrn_reflns_limit_h_max        8 
_diffrn_reflns_limit_k_min        -16 
_diffrn_reflns_limit_k_max        13 
_diffrn_reflns_limit_l_min        -18 
_diffrn_reflns_limit_l_max        18 
_diffrn_reflns_theta_min          2.99 
_diffrn_reflns_theta_max          27.41 
_reflns_number_total              6911 
_reflns_number_gt                 2026 
_reflns_threshold_expression      >2sigma(I) 
 
_publ_section_references
;
Altomare A., Burla M.C., Camalli M., Cascarano G.L., Giacovazzo C., 
Guagliardi A., Moliterni A.G.G., Polidori G.,Spagna R. Sir97.  
(1999) J. Appl. Cryst. 32, 115-119.

Otwinowski, Z. and Minor, W.  (1997).  Methods in Enzymology,
276, Macromolecular Crystallography, part A, 307-326, C. W. Carter,
Jr. and R. M. Sweets, Eds., Academic Press.

Sheldrick, G. M.  (1998).  SHELXTL/PC.  Release 5.10.  Siemens 
Analytical X-ray Instruments, Inc., Madison, WI, USA.


;
_computing_data_collection        'Collect software, Nonius B.V. 1998'
_computing_cell_refinement        'Collect software, Nonius B.V. 1998'
_computing_data_reduction         
;
DENZO and Scalepack (Otwinoski and Minor, 1997)
;
_computing_structure_solution     
;

SIR97 - Altomare A., Burla M.C., Camalli M., Cascarano G.L., Giacovazzo C., 
Guagliardi A., Moliterni A.G.G., Polidori G.,Spagna R.
;
_computing_structure_refinement   'XL SHELXTL/PC, Siemens Analytical'
_computing_molecular_graphics     'XP SHELXTL/PC, Siemens Analytical' 
_computing_publication_material   ? 

 
_refine_special_details 
; 
 Refinement of F^2^ against ALL reflections.  The weighted R-factor wR and 
 goodness of fit S are based on F^2^, conventional R-factors R are based 
 on F, with F set to zero for negative F^2^. The threshold expression of 
 F^2^ > 2sigma(F^2^) is used only for calculating R-factors(gt) etc. and is 
 not relevant to the choice of reflections for refinement.  R-factors based 
 on F^2^ are statistically about twice as large as those based on F, and R- 
 factors based on ALL data will be even larger. 
; 
 
_refine_ls_structure_factor_coef  Fsqd  
_refine_ls_matrix_type            full 
_refine_ls_weighting_scheme       calc  
_refine_ls_weighting_details 
 'calc w=1/[\s^2^(Fo^2^)+(0.0280P)^2^+] where P=(Fo^2^+2Fc^2^)/3' 
_atom_sites_solution_primary      direct 
_atom_sites_solution_secondary    difmap 
_atom_sites_solution_hydrogens    geom 
_refine_ls_hydrogen_treatment     mixed 
_refine_ls_extinction_method      SHELXL 
_refine_ls_extinction_coef        0.0059(10) 
_refine_ls_extinction_expression 
 'Fc^*^=kFc[1+0.001xFc^2^\l^3^/sin(2\q)]^-1/4^' 
_refine_ls_number_reflns          6911 
_refine_ls_number_parameters      424 
_refine_ls_number_restraints      0 
_refine_ls_R_factor_all           0.3121 
_refine_ls_R_factor_gt            0.0781 
_refine_ls_wR_factor_ref          0.1601 
_refine_ls_wR_factor_gt           0.1116 
_refine_ls_goodness_of_fit_ref    0.956 
_refine_ls_restrained_S_all       0.956 
_refine_ls_shift/su_max           0.003 
_refine_ls_shift/su_mean          0.000 
 
loop_ 
 _atom_site_label 
 _atom_site_type_symbol 
 _atom_site_fract_x 
 _atom_site_fract_y 
 _atom_site_fract_z 
 _atom_site_U_iso_or_equiv 
 _atom_site_adp_type 
 _atom_site_occupancy 
 _atom_site_symmetry_multiplicity 
 _atom_site_calc_flag 
 _atom_site_refinement_flags 
 _atom_site_disorder_assembly 
 _atom_site_disorder_group 
N1 N 0.5746(4) 0.3576(3) 0.6039(2) 0.0267(10) Uani 1 1 d . . . 
C2 C 0.4944(6) 0.2807(3) 0.5948(3) 0.0267(12) Uani 1 1 d . . . 
C3 C 0.5811(5) 0.1723(3) 0.5589(3) 0.0287(12) Uani 1 1 d . . . 
H3 H 0.5165 0.1416 0.5267 0.034 Uiso 1 1 d R . . 
C4 C 0.6107(5) 0.1001(3) 0.6429(3) 0.0316(12) Uani 1 1 d . . . 
H4A H 0.6222 0.0261 0.6263 0.038 Uiso 1 1 d R . . 
H4B H 0.5231 0.1163 0.6938 0.038 Uiso 1 1 d R . . 
C5 C 0.7517(5) 0.1162(3) 0.6776(3) 0.0282(12) Uani 1 1 d . . . 
C6 C 0.7862(6) 0.0659(3) 0.7599(3) 0.0350(13) Uani 1 1 d . . . 
C7 C 0.9238(6) 0.0673(4) 0.7896(3) 0.0351(13) Uani 1 1 d . . . 
C8 C 1.0268(6) 0.1225(3) 0.7325(3) 0.0338(13) Uani 1 1 d . . . 
C9 C 0.9953(6) 0.1733(3) 0.6506(3) 0.0301(12) Uani 1 1 d . . . 
C10 C 0.8569(6) 0.1733(3) 0.6237(3) 0.0266(12) Uani 1 1 d . . . 
C11 C 0.8185(5) 0.2346(3) 0.5375(3) 0.0267(12) Uani 1 1 d . . . 
H11 H 0.9145 0.2343 0.4940 0.032 Uiso 1 1 d R . . 
C12 C 0.7381(5) 0.3515(3) 0.5569(3) 0.0272(12) Uani 1 1 d . . . 
H12 H 0.7395 0.3874 0.4971 0.033 Uiso 1 1 d R . . 
C13 C 0.8185(5) 0.4131(3) 0.6135(3) 0.0289(12) Uani 1 1 d . . . 
H13A H 0.9227 0.4124 0.5810 0.035 Uiso 1 1 d R . . 
H13B H 0.8203 0.3781 0.6735 0.035 Uiso 1 1 d R . . 
C14 C 0.7377(5) 0.5269(3) 0.6281(3) 0.0260(12) Uani 1 1 d . . . 
C15 C 0.8162(6) 0.6120(3) 0.6297(3) 0.0296(12) Uani 1 1 d . . . 
C16 C 0.7397(6) 0.7175(3) 0.6406(3) 0.0290(12) Uani 1 1 d . . . 
C17 C 0.5818(5) 0.7376(3) 0.6461(3) 0.0272(12) Uani 1 1 d . . . 
C18 C 0.5022(6) 0.6553(3) 0.6424(3) 0.0292(12) Uani 1 1 d . . . 
C19 C 0.5796(5) 0.5486(3) 0.6357(3) 0.0244(11) Uani 1 1 d . . . 
C20 C 0.4853(5) 0.4606(3) 0.6465(3) 0.0301(12) Uani 1 1 d . . . 
H20 H 0.4016 0.4835 0.6147 0.036 Uiso 1 1 d R . . 
N21 N 0.7238(4) 0.1821(3) 0.4888(2) 0.0295(10) Uani 1 1 d . . . 
O22 O 0.3533(4) 0.2936(2) 0.6234(2) 0.0363(9) Uani 1 1 d . . . 
C23 C 0.8048(5) 0.0769(3) 0.4473(3) 0.0360(13) Uani 1 1 d . . . 
H23A H 0.8969 0.0858 0.4032 0.054 Uiso 1 1 d R . . 
H23B H 0.8309 0.0290 0.4969 0.054 Uiso 1 1 d R . . 
H23C H 0.7387 0.0475 0.4153 0.054 Uiso 1 1 d R . . 
O24 O 0.6787(4) 0.0093(2) 0.8141(2) 0.0442(9) Uani 1 1 d . . . 
C25 C 0.5721(6) 0.0754(4) 0.8852(3) 0.0627(17) Uani 1 1 d . . . 
H25A H 0.5003 0.0340 0.9203 0.094 Uiso 1 1 d R . . 
H25B H 0.6259 0.1019 0.9274 0.094 Uiso 1 1 d R . . 
H25C H 0.5177 0.1347 0.8552 0.094 Uiso 1 1 d R . . 
C26 C 0.9590(6) 0.0103(4) 0.8774(3) 0.0549(16) Uani 1 1 d . . . 
H26C H 1.0679 -0.0120 0.8719 0.082 Uiso 1 1 d R . . 
H26A H 0.9078 -0.0503 0.8883 0.082 Uiso 1 1 d R . . 
H26B H 0.9170 0.0585 0.9297 0.082 Uiso 1 1 d R . . 
O27 O 1.1689(4) 0.1243(2) 0.7556(2) 0.0405(9) Uani 1 1 d . . . 
C28 C 1.1604(6) 0.2102(4) 0.8210(3) 0.0587(16) Uani 1 1 d . . . 
H28A H 1.2604 0.2083 0.8347 0.088 Uiso 1 1 d R . . 
H28B H 1.1272 0.2782 0.7931 0.088 Uiso 1 1 d R . . 
H28C H 1.0887 0.2007 0.8783 0.088 Uiso 1 1 d R . . 
O29 O 1.1004(4) 0.2260(2) 0.5933(2) 0.0346(9) Uani 1 1 d . . . 
O30 O 0.9765(4) 0.5912(2) 0.6170(2) 0.0362(9) Uani 1 1 d . . . 
C31 C 1.0350(6) 0.5475(4) 0.6975(3) 0.0539(15) Uani 1 1 d . . . 
H31A H 1.1453 0.5365 0.6823 0.081 Uiso 1 1 d R . . 
H31B H 0.9973 0.5957 0.7501 0.081 Uiso 1 1 d R . . 
H31C H 1.0025 0.4800 0.7137 0.081 Uiso 1 1 d R . . 
C32 C 0.8237(5) 0.8087(3) 0.6481(3) 0.0342(13) Uani 1 1 d . . . 
H32C H 0.7625 0.8608 0.6935 0.051 Uiso 1 1 d R . . 
H32A H 0.8468 0.8415 0.5871 0.051 Uiso 1 1 d R . . 
H32B H 0.9193 0.7797 0.6664 0.051 Uiso 1 1 d R . . 
O33 O 0.5059(3) 0.8446(2) 0.6503(2) 0.0358(8) Uani 1 1 d . . . 
C34 C 0.4155(5) 0.8752(3) 0.7417(3) 0.0467(14) Uani 1 1 d . . . 
H34A H 0.3668 0.9490 0.7395 0.070 Uiso 1 1 d R . . 
H34B H 0.3383 0.8313 0.7598 0.070 Uiso 1 1 d R . . 
H34C H 0.4807 0.8670 0.7871 0.070 Uiso 1 1 d R . . 
O35 O 0.3446(4) 0.6775(2) 0.6501(2) 0.0322(8) Uani 1 1 d . . . 
C36 C 0.4214(6) 0.4447(4) 0.7513(3) 0.0423(14) Uani 1 1 d . . . 
H36A H 0.3593 0.3899 0.7586 0.051 Uiso 1 1 d R . . 
H36B H 0.3583 0.5098 0.7787 0.051 Uiso 1 1 d R . . 
O37 O 0.5445(4) 0.4127(2) 0.7981(2) 0.0500(10) Uani 1 1 d . . . 
C38 C 0.4971(7) 0.3914(4) 0.8950(3) 0.0662(19) Uani 1 1 d . . . 
H38A H 0.4542 0.3269 0.9031 0.079 Uiso 1 1 d R . . 
H38B H 0.4206 0.4500 0.9241 0.079 Uiso 1 1 d R . . 
C39 C 0.6364(9) 0.3775(4) 0.9411(4) 0.0642(19) Uani 1 1 d . . . 
C40 C 0.6378(11) 0.3215(5) 1.0233(5) 0.126(3) Uani 1 1 d . . . 
H40 H 0.5537 0.2861 1.0504 0.151 Uiso 1 1 d R . . 
C41 C 0.7588(13) 0.3145(6) 1.0704(6) 0.124(4) Uani 1 1 d . . . 
H41 H 0.7605 0.2761 1.1289 0.149 Uiso 1 1 d R . . 
C42 C 0.8800(11) 0.3615(6) 1.0320(6) 0.108(3) Uani 1 1 d . . . 
H42 H 0.9664 0.3547 1.0623 0.130 Uiso 1 1 d R . . 
C43 C 0.8823(8) 0.4190(6) 0.9492(5) 0.095(2) Uani 1 1 d . . . 
H43 H 0.9661 0.4550 0.9227 0.114 Uiso 1 1 d R . . 
C44 C 0.7586(8) 0.4272(5) 0.9035(4) 0.0684(19) Uani 1 1 d . . . 
H44 H 0.7588 0.4663 0.8453 0.082 Uiso 1 1 d R . . 
O1A O 0.6645(10) -0.1764(6) 0.9328(5) 0.089(3) Uani 0.50 1 d P . . 
H1A H 0.6855 -0.1252 0.8967 0.133 Uiso 0.50 1 d PR . . 
C2A C 0.7563(16) -0.2716(9) 0.8954(9) 0.121(6) Uani 0.50 1 d P . . 
H2AC H 0.8478 -0.2874 0.9211 0.182 Uiso 0.50 1 d PR . . 
H2AA H 0.7843 -0.2682 0.8277 0.182 Uiso 0.50 1 d PR . . 
H2AB H 0.6976 -0.3278 0.9121 0.182 Uiso 0.50 1 d PR . . 
H35 H 0.319(5) 0.736(4) 0.600(3) 0.063(15) Uiso 1 1 d . . . 
H29 H 1.203(7) 0.225(4) 0.614(4) 0.11(2) Uiso 1 1 d . . . 
 
loop_ 
 _atom_site_aniso_label 
 _atom_site_aniso_U_11 
 _atom_site_aniso_U_22 
 _atom_site_aniso_U_33 
 _atom_site_aniso_U_23 
 _atom_site_aniso_U_13 
 _atom_site_aniso_U_12 
N1 0.022(3) 0.022(2) 0.036(2) -0.0040(18) 0.000(2) -0.010(2) 
C2 0.024(3) 0.024(3) 0.032(3) 0.001(2) -0.007(3) -0.004(3) 
C3 0.020(3) 0.024(3) 0.043(3) -0.009(2) -0.009(3) -0.003(2) 
C4 0.030(3) 0.028(3) 0.037(3) -0.001(2) -0.010(3) -0.003(2) 
C5 0.027(3) 0.021(3) 0.036(3) -0.001(2) -0.007(3) -0.002(2) 
C6 0.040(4) 0.026(3) 0.037(3) -0.002(2) -0.001(3) -0.009(3) 
C7 0.046(4) 0.032(3) 0.032(3) 0.003(2) -0.014(3) -0.013(3) 
C8 0.036(4) 0.025(3) 0.045(3) -0.005(3) -0.021(3) -0.001(3) 
C9 0.032(4) 0.023(3) 0.036(3) -0.006(2) -0.005(3) -0.006(3) 
C10 0.031(4) 0.016(2) 0.034(3) 0.003(2) -0.010(3) -0.005(2) 
C11 0.021(3) 0.027(3) 0.032(3) -0.004(2) -0.004(2) -0.004(2) 
C12 0.032(3) 0.018(3) 0.032(3) -0.001(2) -0.009(3) -0.002(2) 
C13 0.021(3) 0.029(3) 0.037(3) -0.004(2) -0.007(2) -0.006(2) 
C14 0.024(3) 0.019(3) 0.035(3) -0.001(2) -0.005(2) -0.004(2) 
C15 0.024(3) 0.031(3) 0.034(3) -0.001(2) -0.007(3) -0.004(3) 
C16 0.029(3) 0.033(3) 0.026(3) -0.004(2) -0.007(2) -0.007(3) 
C17 0.027(4) 0.020(3) 0.033(3) -0.001(2) -0.005(2) -0.001(3) 
C18 0.025(4) 0.031(3) 0.035(3) -0.001(2) -0.010(2) -0.007(3) 
C19 0.023(3) 0.023(3) 0.027(3) -0.003(2) -0.004(2) -0.004(2) 
C20 0.027(3) 0.030(3) 0.034(3) -0.004(2) -0.006(2) -0.008(2) 
N21 0.028(3) 0.024(2) 0.038(2) -0.0045(18) -0.010(2) -0.0043(19) 
O22 0.026(2) 0.0333(19) 0.052(2) -0.0036(16) -0.0087(19) -0.0087(17) 
C23 0.035(3) 0.029(3) 0.043(3) -0.012(2) -0.002(3) -0.006(2) 
O24 0.043(3) 0.049(2) 0.042(2) 0.0040(18) -0.0067(19) -0.0122(19) 
C25 0.057(4) 0.080(4) 0.048(4) 0.002(3) 0.004(3) -0.022(3) 
C26 0.060(4) 0.061(4) 0.052(3) 0.024(3) -0.031(3) -0.016(3) 
O27 0.038(2) 0.039(2) 0.050(2) -0.0029(17) -0.0230(19) -0.0043(17) 
C28 0.061(4) 0.064(4) 0.060(4) -0.012(3) -0.024(3) -0.019(3) 
O29 0.027(2) 0.036(2) 0.045(2) 0.0042(16) -0.0113(19) -0.0107(18) 
O30 0.036(2) 0.0328(19) 0.042(2) 0.0005(15) -0.0097(18) -0.0081(17) 
C31 0.039(4) 0.060(4) 0.070(4) 0.017(3) -0.029(3) -0.014(3) 
C32 0.022(3) 0.033(3) 0.046(3) -0.003(2) 0.000(2) -0.010(2) 
O33 0.032(2) 0.0279(19) 0.045(2) -0.0005(15) -0.0052(17) -0.0026(16) 
C34 0.041(4) 0.042(3) 0.053(3) -0.012(3) 0.002(3) -0.008(3) 
O35 0.029(2) 0.0298(19) 0.038(2) 0.0024(16) -0.0099(17) -0.0045(17) 
C36 0.043(4) 0.037(3) 0.048(4) -0.009(3) -0.001(3) -0.017(3) 
O37 0.052(3) 0.061(2) 0.033(2) 0.0041(17) -0.0057(19) -0.003(2) 
C38 0.113(6) 0.057(4) 0.039(4) -0.001(3) -0.011(4) -0.045(4) 
C39 0.119(7) 0.044(4) 0.035(4) 0.003(3) -0.022(4) -0.022(4) 
C40 0.263(11) 0.082(5) 0.080(5) 0.041(4) -0.096(6) -0.091(6) 
C41 0.236(13) 0.092(6) 0.079(6) 0.038(5) -0.075(7) -0.077(7) 
C42 0.148(9) 0.089(6) 0.092(7) -0.001(5) -0.070(6) 0.018(6) 
C43 0.084(6) 0.128(6) 0.070(5) -0.015(5) -0.025(5) 0.002(5) 
C44 0.074(5) 0.083(5) 0.048(4) -0.002(4) -0.020(4) -0.004(4) 
O1A 0.115(8) 0.059(5) 0.088(6) 0.011(5) -0.011(6) -0.018(5) 
C2A 0.160(16) 0.060(9) 0.103(11) 0.001(8) 0.019(10) 0.033(10) 
 
_geom_special_details 
; 
 All esds (except the esd in the dihedral angle between two l.s. planes) 
 are estimated using the full covariance matrix.  The cell esds are taken 
 into account individually in the estimation of esds in distances, angles 
 and torsion angles; correlations between esds in cell parameters are only 
 used when they are defined by crystal symmetry.  An approximate (isotropic) 
 treatment of cell esds is used for estimating esds involving l.s. planes. 
; 
 
loop_ 
 _geom_bond_atom_site_label_1 
 _geom_bond_atom_site_label_2 
 _geom_bond_distance 
 _geom_bond_site_symmetry_2 
 _geom_bond_publ_flag 
N1 C2 1.342(5) . ? 
N1 C12 1.482(5) . ? 
N1 C20 1.485(5) . ? 
C2 O22 1.239(5) . ? 
C2 C3 1.504(5) . ? 
C3 N21 1.488(5) . ? 
C3 C4 1.530(5) . ? 
C3 H3 0.9600 . ? 
C4 C5 1.512(6) . ? 
C4 H4A 0.9601 . ? 
C4 H4B 0.9600 . ? 
C5 C10 1.392(6) . ? 
C5 C6 1.394(6) . ? 
C6 C7 1.400(6) . ? 
C6 O24 1.403(5) . ? 
C7 C8 1.384(6) . ? 
C7 C26 1.498(6) . ? 
C8 C9 1.381(6) . ? 
C8 O27 1.397(5) . ? 
C9 O29 1.378(5) . ? 
C9 C10 1.386(6) . ? 
C10 C11 1.509(6) . ? 
C11 N21 1.472(5) . ? 
C11 C12 1.535(5) . ? 
C11 H11 0.9600 . ? 
C12 C13 1.521(5) . ? 
C12 H12 0.9599 . ? 
C13 C14 1.494(5) . ? 
C13 H13A 0.9599 . ? 
C13 H13B 0.9599 . ? 
C14 C19 1.386(5) . ? 
C14 C15 1.399(6) . ? 
C15 C16 1.386(5) . ? 
C15 O30 1.398(5) . ? 
C16 C17 1.388(6) . ? 
C16 C32 1.514(5) . ? 
C17 C18 1.380(5) . ? 
C17 O33 1.399(4) . ? 
C18 O35 1.382(5) . ? 
C18 C19 1.400(5) . ? 
C19 C20 1.509(6) . ? 
C20 C36 1.526(6) . ? 
C20 H20 0.9601 . ? 
N21 C23 1.482(4) . ? 
C23 H23A 0.9600 . ? 
C23 H23B 0.9600 . ? 
C23 H23C 0.9600 . ? 
O24 C25 1.431(5) . ? 
C25 H25A 0.9600 . ? 
C25 H25B 0.9600 . ? 
C25 H25C 0.9599 . ? 
C26 H26C 0.9600 . ? 
C26 H26A 0.9600 . ? 
C26 H26B 0.9600 . ? 
O27 C28 1.451(5) . ? 
C28 H28A 0.9600 . ? 
C28 H28B 0.9600 . ? 
C28 H28C 0.9599 . ? 
O29 H29 1.03(6) . ? 
O30 C31 1.427(5) . ? 
C31 H31A 0.9600 . ? 
C31 H31B 0.9600 . ? 
C31 H31C 0.9599 . ? 
C32 H32C 0.9599 . ? 
C32 H32A 0.9601 . ? 
C32 H32B 0.9599 . ? 
O33 C34 1.429(5) . ? 
C34 H34A 0.9599 . ? 
C34 H34B 0.9599 . ? 
C34 H34C 0.9601 . ? 
O35 H35 1.04(4) . ? 
C36 O37 1.408(5) . ? 
C36 H36A 0.9600 . ? 
C36 H36B 0.9600 . ? 
O37 C38 1.410(5) . ? 
C38 C39 1.522(7) . ? 
C38 H38A 0.9600 . ? 
C38 H38B 0.9600 . ? 
C39 C40 1.362(7) . ? 
C39 C44 1.376(7) . ? 
C40 C41 1.391(10) . ? 
C40 H40 0.9599 . ? 
C41 C42 1.351(10) . ? 
C41 H41 0.9600 . ? 
C42 C43 1.377(9) . ? 
C42 H42 0.9601 . ? 
C43 C44 1.397(7) . ? 
C43 H43 0.9599 . ? 
C44 H44 0.9598 . ? 
O1A C2A 1.390(11) . ? 
O1A H1A 0.8400 . ? 
C2A H2AC 0.9600 . ? 
C2A H2AA 0.9601 . ? 
C2A H2AB 0.9600 . ? 
 
loop_ 
 _geom_angle_atom_site_label_1 
 _geom_angle_atom_site_label_2 
 _geom_angle_atom_site_label_3 
 _geom_angle 
 _geom_angle_site_symmetry_1 
 _geom_angle_site_symmetry_3 
 _geom_angle_publ_flag 
C2 N1 C12 122.7(3) . . ? 
C2 N1 C20 116.8(4) . . ? 
C12 N1 C20 119.3(3) . . ? 
O22 C2 N1 121.8(4) . . ? 
O22 C2 C3 119.2(4) . . ? 
N1 C2 C3 118.6(4) . . ? 
N21 C3 C2 111.0(4) . . ? 
N21 C3 C4 113.3(3) . . ? 
C2 C3 C4 109.2(3) . . ? 
N21 C3 H3 107.3 . . ? 
C2 C3 H3 107.5 . . ? 
C4 C3 H3 108.3 . . ? 
C5 C4 C3 112.9(4) . . ? 
C5 C4 H4A 108.9 . . ? 
C3 C4 H4A 110.2 . . ? 
C5 C4 H4B 108.4 . . ? 
C3 C4 H4B 108.4 . . ? 
H4A C4 H4B 108.0 . . ? 
C10 C5 C6 118.5(5) . . ? 
C10 C5 C4 120.7(4) . . ? 
C6 C5 C4 120.5(5) . . ? 
C5 C6 C7 123.1(5) . . ? 
C5 C6 O24 118.0(5) . . ? 
C7 C6 O24 118.9(4) . . ? 
C8 C7 C6 116.3(4) . . ? 
C8 C7 C26 121.8(5) . . ? 
C6 C7 C26 121.8(5) . . ? 
C9 C8 C7 121.7(5) . . ? 
C9 C8 O27 118.6(5) . . ? 
C7 C8 O27 119.7(4) . . ? 
O29 C9 C8 121.1(5) . . ? 
O29 C9 C10 117.8(4) . . ? 
C8 C9 C10 121.1(5) . . ? 
C9 C10 C5 119.1(4) . . ? 
C9 C10 C11 121.0(5) . . ? 
C5 C10 C11 119.9(4) . . ? 
N21 C11 C10 112.8(4) . . ? 
N21 C11 C12 108.0(3) . . ? 
C10 C11 C12 114.4(3) . . ? 
N21 C11 H11 106.5 . . ? 
C10 C11 H11 106.4 . . ? 
C12 C11 H11 108.4 . . ? 
N1 C12 C13 110.4(3) . . ? 
N1 C12 C11 111.0(4) . . ? 
C13 C12 C11 113.4(3) . . ? 
N1 C12 H12 107.2 . . ? 
C13 C12 H12 106.7 . . ? 
C11 C12 H12 107.8 . . ? 
C14 C13 C12 111.1(3) . . ? 
C14 C13 H13A 108.8 . . ? 
C12 C13 H13A 110.1 . . ? 
C14 C13 H13B 109.9 . . ? 
C12 C13 H13B 108.5 . . ? 
H13A C13 H13B 108.3 . . ? 
C19 C14 C15 119.3(4) . . ? 
C19 C14 C13 118.0(4) . . ? 
C15 C14 C13 122.6(4) . . ? 
C16 C15 O30 118.6(4) . . ? 
C16 C15 C14 121.8(5) . . ? 
O30 C15 C14 119.5(4) . . ? 
C15 C16 C17 117.9(4) . . ? 
C15 C16 C32 121.6(4) . . ? 
C17 C16 C32 120.4(4) . . ? 
C18 C17 C16 121.4(4) . . ? 
C18 C17 O33 120.5(4) . . ? 
C16 C17 O33 118.0(4) . . ? 
C17 C18 O35 120.1(4) . . ? 
C17 C18 C19 120.2(5) . . ? 
O35 C18 C19 119.6(4) . . ? 
C14 C19 C18 119.3(4) . . ? 
C14 C19 C20 122.1(4) . . ? 
C18 C19 C20 118.3(4) . . ? 
N1 C20 C19 112.7(4) . . ? 
N1 C20 C36 110.0(4) . . ? 
C19 C20 C36 109.1(3) . . ? 
N1 C20 H20 108.1 . . ? 
C19 C20 H20 107.6 . . ? 
C36 C20 H20 109.3 . . ? 
C11 N21 C23 113.1(3) . . ? 
C11 N21 C3 106.9(3) . . ? 
C23 N21 C3 111.8(3) . . ? 
N21 C23 H23A 109.8 . . ? 
N21 C23 H23B 109.2 . . ? 
H23A C23 H23B 109.5 . . ? 
N21 C23 H23C 109.4 . . ? 
H23A C23 H23C 109.5 . . ? 
H23B C23 H23C 109.5 . . ? 
C6 O24 C25 112.0(3) . . ? 
O24 C25 H25A 109.4 . . ? 
O24 C25 H25B 110.1 . . ? 
H25A C25 H25B 109.5 . . ? 
O24 C25 H25C 108.9 . . ? 
H25A C25 H25C 109.5 . . ? 
H25B C25 H25C 109.5 . . ? 
C7 C26 H26C 110.7 . . ? 
C7 C26 H26A 109.1 . . ? 
H26C C26 H26A 110.7 . . ? 
C7 C26 H26B 108.0 . . ? 
H26C C26 H26B 110.7 . . ? 
H26A C26 H26B 107.5 . . ? 
C8 O27 C28 112.1(3) . . ? 
O27 C28 H28A 109.1 . . ? 
O27 C28 H28B 109.7 . . ? 
H28A C28 H28B 109.5 . . ? 
O27 C28 H28C 109.5 . . ? 
H28A C28 H28C 109.5 . . ? 
H28B C28 H28C 109.5 . . ? 
C9 O29 H29 117(3) . . ? 
C15 O30 C31 115.1(4) . . ? 
O30 C31 H31A 109.0 . . ? 
O30 C31 H31B 110.3 . . ? 
H31A C31 H31B 109.5 . . ? 
O30 C31 H31C 109.1 . . ? 
H31A C31 H31C 109.5 . . ? 
H31B C31 H31C 109.5 . . ? 
C16 C32 H32C 110.7 . . ? 
C16 C32 H32A 109.0 . . ? 
H32C C32 H32A 110.2 . . ? 
C16 C32 H32B 108.7 . . ? 
H32C C32 H32B 110.3 . . ? 
H32A C32 H32B 107.8 . . ? 
C17 O33 C34 113.2(3) . . ? 
O33 C34 H34A 108.8 . . ? 
O33 C34 H34B 110.1 . . ? 
H34A C34 H34B 109.5 . . ? 
O33 C34 H34C 109.5 . . ? 
H34A C34 H34C 109.5 . . ? 
H34B C34 H34C 109.5 . . ? 
C18 O35 H35 108(3) . . ? 
O37 C36 C20 109.1(4) . . ? 
O37 C36 H36A 109.3 . . ? 
C20 C36 H36A 109.5 . . ? 
O37 C36 H36B 109.9 . . ? 
C20 C36 H36B 110.7 . . ? 
H36A C36 H36B 108.4 . . ? 
C36 O37 C38 113.5(4) . . ? 
O37 C38 C39 108.6(5) . . ? 
O37 C38 H38A 110.2 . . ? 
C39 C38 H38A 109.5 . . ? 
O37 C38 H38B 109.8 . . ? 
C39 C38 H38B 109.7 . . ? 
H38A C38 H38B 109.0 . . ? 
C40 C39 C44 119.0(7) . . ? 
C40 C39 C38 120.6(7) . . ? 
C44 C39 C38 120.4(5) . . ? 
C39 C40 C41 121.5(8) . . ? 
C39 C40 H40 120.0 . . ? 
C41 C40 H40 118.4 . . ? 
C42 C41 C40 119.1(8) . . ? 
C42 C41 H41 118.5 . . ? 
C40 C41 H41 122.3 . . ? 
C41 C42 C43 120.9(8) . . ? 
C41 C42 H42 120.1 . . ? 
C43 C42 H42 119.0 . . ? 
C42 C43 C44 119.4(8) . . ? 
C42 C43 H43 121.4 . . ? 
C44 C43 H43 119.2 . . ? 
C39 C44 C43 120.0(6) . . ? 
C39 C44 H44 119.4 . . ? 
C43 C44 H44 120.5 . . ? 
C2A O1A H1A 109.3 . . ? 
O1A C2A H2AC 110.6 . . ? 
O1A C2A H2AA 111.4 . . ? 
H2AC C2A H2AA 109.4 . . ? 
O1A C2A H2AB 107.5 . . ? 
H2AC C2A H2AB 109.4 . . ? 
H2AA C2A H2AB 108.4 . . ? 
 
loop_ 
 _geom_torsion_atom_site_label_1 
 _geom_torsion_atom_site_label_2 
 _geom_torsion_atom_site_label_3 
 _geom_torsion_atom_site_label_4 
 _geom_torsion 
 _geom_torsion_site_symmetry_1 
 _geom_torsion_site_symmetry_2 
 _geom_torsion_site_symmetry_3 
 _geom_torsion_site_symmetry_4 
 _geom_torsion_publ_flag 
C12 N1 C2 O22 -169.7(4) . . . . ? 
C20 N1 C2 O22 -2.3(6) . . . . ? 
C12 N1 C2 C3 17.2(6) . . . . ? 
C20 N1 C2 C3 -175.4(3) . . . . ? 
O22 C2 C3 N21 152.9(4) . . . . ? 
N1 C2 C3 N21 -33.8(5) . . . . ? 
O22 C2 C3 C4 -81.4(5) . . . . ? 
N1 C2 C3 C4 91.9(5) . . . . ? 
N21 C3 C4 C5 40.6(5) . . . . ? 
C2 C3 C4 C5 -83.8(5) . . . . ? 
C3 C4 C5 C10 -13.1(5) . . . . ? 
C3 C4 C5 C6 172.9(4) . . . . ? 
C10 C5 C6 C7 -2.0(6) . . . . ? 
C4 C5 C6 C7 172.2(4) . . . . ? 
C10 C5 C6 O24 179.5(3) . . . . ? 
C4 C5 C6 O24 -6.3(6) . . . . ? 
C5 C6 C7 C8 0.2(6) . . . . ? 
O24 C6 C7 C8 178.8(4) . . . . ? 
C5 C6 C7 C26 -178.6(4) . . . . ? 
O24 C6 C7 C26 -0.1(6) . . . . ? 
C6 C7 C8 C9 -0.1(6) . . . . ? 
C26 C7 C8 C9 178.8(4) . . . . ? 
C6 C7 C8 O27 -177.8(4) . . . . ? 
C26 C7 C8 O27 1.1(6) . . . . ? 
C7 C8 C9 O29 -178.6(4) . . . . ? 
O27 C8 C9 O29 -0.9(6) . . . . ? 
C7 C8 C9 C10 1.7(6) . . . . ? 
O27 C8 C9 C10 179.4(3) . . . . ? 
O29 C9 C10 C5 176.8(4) . . . . ? 
C8 C9 C10 C5 -3.4(6) . . . . ? 
O29 C9 C10 C11 -3.6(5) . . . . ? 
C8 C9 C10 C11 176.1(4) . . . . ? 
C6 C5 C10 C9 3.5(6) . . . . ? 
C4 C5 C10 C9 -170.7(4) . . . . ? 
C6 C5 C10 C11 -176.1(4) . . . . ? 
C4 C5 C10 C11 9.7(6) . . . . ? 
C9 C10 C11 N21 147.2(4) . . . . ? 
C5 C10 C11 N21 -33.2(5) . . . . ? 
C9 C10 C11 C12 -88.8(5) . . . . ? 
C5 C10 C11 C12 90.7(5) . . . . ? 
C2 N1 C12 C13 -152.1(4) . . . . ? 
C20 N1 C12 C13 40.7(5) . . . . ? 
C2 N1 C12 C11 -25.5(5) . . . . ? 
C20 N1 C12 C11 167.4(3) . . . . ? 
N21 C11 C12 N1 50.9(4) . . . . ? 
C10 C11 C12 N1 -75.5(5) . . . . ? 
N21 C11 C12 C13 175.9(4) . . . . ? 
C10 C11 C12 C13 49.4(6) . . . . ? 
N1 C12 C13 C14 -56.2(5) . . . . ? 
C11 C12 C13 C14 178.5(4) . . . . ? 
C12 C13 C14 C19 31.8(5) . . . . ? 
C12 C13 C14 C15 -145.0(4) . . . . ? 
C19 C14 C15 C16 1.3(6) . . . . ? 
C13 C14 C15 C16 178.0(4) . . . . ? 
C19 C14 C15 O30 -176.6(4) . . . . ? 
C13 C14 C15 O30 0.2(6) . . . . ? 
O30 C15 C16 C17 175.3(4) . . . . ? 
C14 C15 C16 C17 -2.5(6) . . . . ? 
O30 C15 C16 C32 -5.8(6) . . . . ? 
C14 C15 C16 C32 176.3(4) . . . . ? 
C15 C16 C17 C18 1.0(6) . . . . ? 
C32 C16 C17 C18 -177.9(4) . . . . ? 
C15 C16 C17 O33 -175.6(4) . . . . ? 
C32 C16 C17 O33 5.5(6) . . . . ? 
C16 C17 C18 O35 178.6(4) . . . . ? 
O33 C17 C18 O35 -4.9(6) . . . . ? 
C16 C17 C18 C19 1.8(6) . . . . ? 
O33 C17 C18 C19 178.3(4) . . . . ? 
C15 C14 C19 C18 1.6(6) . . . . ? 
C13 C14 C19 C18 -175.3(4) . . . . ? 
C15 C14 C19 C20 -172.3(4) . . . . ? 
C13 C14 C19 C20 10.8(6) . . . . ? 
C17 C18 C19 C14 -3.1(6) . . . . ? 
O35 C18 C19 C14 -179.9(4) . . . . ? 
C17 C18 C19 C20 171.0(4) . . . . ? 
O35 C18 C19 C20 -5.8(6) . . . . ? 
C2 N1 C20 C19 -168.3(4) . . . . ? 
C12 N1 C20 C19 -0.4(5) . . . . ? 
C2 N1 C20 C36 69.8(5) . . . . ? 
C12 N1 C20 C36 -122.3(4) . . . . ? 
C14 C19 C20 N1 -27.5(5) . . . . ? 
C18 C19 C20 N1 158.6(4) . . . . ? 
C14 C19 C20 C36 95.0(5) . . . . ? 
C18 C19 C20 C36 -78.9(5) . . . . ? 
C10 C11 N21 C23 -65.4(5) . . . . ? 
C12 C11 N21 C23 167.2(3) . . . . ? 
C10 C11 N21 C3 58.1(4) . . . . ? 
C12 C11 N21 C3 -69.3(4) . . . . ? 
C2 C3 N21 C11 59.9(4) . . . . ? 
C4 C3 N21 C11 -63.4(4) . . . . ? 
C2 C3 N21 C23 -175.8(3) . . . . ? 
C4 C3 N21 C23 60.9(4) . . . . ? 
C5 C6 O24 C25 -91.6(4) . . . . ? 
C7 C6 O24 C25 89.8(5) . . . . ? 
C9 C8 O27 C28 95.8(5) . . . . ? 
C7 C8 O27 C28 -86.4(5) . . . . ? 
C16 C15 O30 C31 105.2(5) . . . . ? 
C14 C15 O30 C31 -76.9(5) . . . . ? 
C18 C17 O33 C34 76.3(5) . . . . ? 
C16 C17 O33 C34 -107.0(4) . . . . ? 
N1 C20 C36 O37 62.4(5) . . . . ? 
C19 C20 C36 O37 -61.7(4) . . . . ? 
C20 C36 O37 C38 -177.4(4) . . . . ? 
C36 O37 C38 C39 -169.9(4) . . . . ? 
O37 C38 C39 C40 -157.2(5) . . . . ? 
O37 C38 C39 C44 26.9(7) . . . . ? 
C44 C39 C40 C41 0.8(11) . . . . ? 
C38 C39 C40 C41 -175.1(6) . . . . ? 
C39 C40 C41 C42 -2.3(12) . . . . ? 
C40 C41 C42 C43 2.4(13) . . . . ? 
C41 C42 C43 C44 -1.1(11) . . . . ? 
C40 C39 C44 C43 0.5(9) . . . . ? 
C38 C39 C44 C43 176.5(5) . . . . ? 
C42 C43 C44 C39 -0.4(9) . . . . ? 
 
loop_ 
 _geom_hbond_atom_site_label_D 
 _geom_hbond_atom_site_label_H 
 _geom_hbond_atom_site_label_A 
 _geom_hbond_distance_DH 
 _geom_hbond_distance_HA 
 _geom_hbond_distance_DA 
 _geom_hbond_angle_DHA 
 _geom_hbond_site_symmetry_A 
O1A H1A O24  0.84 2.04 2.864(8) 165.8 . 
O35 H35 N21  1.04(4) 1.68(5) 2.722(4) 172(4) 2_666 
O29 H29 O22  1.03(6) 1.77(6) 2.703(5) 149(5) 1_655 
 
_diffrn_measured_fraction_theta_max    0.953 
_diffrn_reflns_theta_full              27.41 
_diffrn_measured_fraction_theta_full   0.953 
_refine_diff_density_max    0.260 
_refine_diff_density_min   -0.236 
_refine_diff_density_rms    0.058 
